# Supplementary material for: Acupuncture for comorbid depression and insomnia in perimenopause: A feasibility patient-assessor-blinded, randomized, and sham-controlled clinical trial
Source: Frontiers journal article supplement (doi:10.3389/fpubh.2023.1120567), 2023-02-06
Supplement: Data_Sheet_1.pdf [file Data_Sheet_1.pdf]

## Supplementary materials

### Appendix 1 Diagnostic criteria for "Depression of *Liver* and Deficiency of *Kidney*" pattern

| Symptoms                                                                                                                                                                                                   | Descriptions                                                                                                                                                                                                                                                                  |
|------------------------------------------------------------------------------------------------------------------------------------------------------------------------------------------------------------|-------------------------------------------------------------------------------------------------------------------------------------------------------------------------------------------------------------------------------------------------------------------------------|
| Primary symptoms                                                                                                                                                                                           | depressed mood, fatigue, chest distress and preference for sighing, insomnia or dreamful sleep, hot flashes and sweating, women with menstrual disorders, low menstrual flow or menopause, red tongue with little coating, string and thready pulse or string and rapid pulse |
| Secondary symptoms                                                                                                                                                                                         | frequent urination; dribbling urination                                                                                                                                                                                                                                       |
|                                                                                                                                                                                                            | distending pain of breasts                                                                                                                                                                                                                                                    |
|                                                                                                                                                                                                            | headache; fullness in head                                                                                                                                                                                                                                                    |
|                                                                                                                                                                                                            | hypochondrium distress and/or pain                                                                                                                                                                                                                                            |
|                                                                                                                                                                                                            | soreness and weakness of waist and knees or heel pain                                                                                                                                                                                                                         |
|                                                                                                                                                                                                            | dysphoria                                                                                                                                                                                                                                                                     |
|                                                                                                                                                                                                            | feverish feeling in palms and/or soles                                                                                                                                                                                                                                        |
|                                                                                                                                                                                                            | blurred vision                                                                                                                                                                                                                                                                |
|                                                                                                                                                                                                            | dizziness and tinnitus                                                                                                                                                                                                                                                        |
|                                                                                                                                                                                                            | spontaneous sweat                                                                                                                                                                                                                                                             |
|                                                                                                                                                                                                            | memory loss                                                                                                                                                                                                                                                                   |
|                                                                                                                                                                                                            | hyposexuality                                                                                                                                                                                                                                                                 |
|                                                                                                                                                                                                            | thirsty                                                                                                                                                                                                                                                                       |
| <b>Diagnosis criteria:</b> meet all the primary symptoms with or without secondary symptoms can be diagnosed as insomnia with TCM pattern of “Depression of <i>Liver</i> and Deficiency of <i>Kidney</i> ” |                                                                                                                                                                                                                                                                               |

## **Appendix 2 Suggestion list for mental health and sleep hygiene in perimenopause**

|                                                                                                                                                                                                                                                                                                                                                |
|------------------------------------------------------------------------------------------------------------------------------------------------------------------------------------------------------------------------------------------------------------------------------------------------------------------------------------------------|
| 1. Correctly understand that perimenopause is a normal physiological process, and some of the symptoms that you experience are caused by sex hormone fluctuations. After a period of time, you will gradually adapt perimenopause                                                                                                              |
| 2. Have regular life and rest, and not to stay up late                                                                                                                                                                                                                                                                                         |
| 3. Have a balanced diet; do not eat food that is too spicy, too cold, greasy, salty or too sweet                                                                                                                                                                                                                                               |
| 4. Try to maintain a positive mood                                                                                                                                                                                                                                                                                                             |
| 5. Actively participate in entertainment, exercise and social activities                                                                                                                                                                                                                                                                       |
| 6. Maintain a moderate sex life                                                                                                                                                                                                                                                                                                                |
| 7. Keep a healthy sleep habit (e.g., don't use your electronic products while lying in bed, keep a calm mood half an hour before going to bed, including not watching exciting movies or TV shows, or chatting excitedly with family or friends, don't eat anything or do vigorous physical activity within 2 hours before going to bed, etc.) |
| 8. Harmonize with the relationship between yourself and family, colleagues, and friends                                                                                                                                                                                                                                                        |
| 9. Regular physical examinations, especially the examinations of gynecological, breast and endocrine                                                                                                                                                                                                                                           |
| 10. Do not bring the problem to bed, leave the problem for tomorrow (do not think about the problem or make plans while lying in bed)                                                                                                                                                                                                          |

### Appendix 3 Main indications of each selected acupoint in the RA/SA group

| Groups   | Acupoints | Main indications according to “ <i>Indications of acupoints (National Standard of People's Republic of China, GB/T 30233-2013)</i> ”                                     |
|----------|-----------|--------------------------------------------------------------------------------------------------------------------------------------------------------------------------|
| RA group | CV4       | Hernia; abdominal pain; urinary retention; spermatorrhea; impotence; irregular menstruation; dysmenorrhea; lochiorrhea; uterine prolapse; infertility; diarrhea; fatigue |
|          | CV7       | Hernia; abdominal pain; irregular menstruation; infertility; postpartum disorder; urinary retention; edema                                                               |
|          | EX-CA1    | irregular menstruation; dysmenorrhea; infertility; uterine prolapse                                                                                                      |
|          | EX-HN3    | mental and psychological disorders                                                                                                                                       |
|          | GV20      | mental and psychological disorders; head/face diseases; anal prolapse and hysteroptosis                                                                                  |
|          | PC6       | mental and psychological disorders; cardiac diseases; palpitations; chest tightness; stomachache; vomiting; hiccups; upper extremity pain                                |
|          | KI3       | gynecological disorders; genitourinary system disorders; lower extremity paralysis; respiratory system disorders                                                         |
|          | LR3       | gynecological disorders; genitourinary system disorders; lower extremity paralysis; sore throat                                                                          |
|          | SP6       | gynecology disorders; genitourinary system disorders; digestive system disorders                                                                                         |
| SA group | GB38      | waist and lower extremities pain/limited mobility; chest pain; sore throat                                                                                               |
|          | GB39      | waist and lower extremities pain/limited mobility; inappetence and distention                                                                                            |
|          | LI12      | elbow and arm pain, numbness or paralysis                                                                                                                                |
|          | LI13      | elbow and arm pain; tuberculosis of lymph nodes                                                                                                                          |
|          | ST38      | lower extremity paralysis                                                                                                                                                |
|          | TE8       | deafness; hoarseness; toothache; upper extremity pain                                                                                                                    |
|          | TE9       | deafness; toothache; upper extremity pain                                                                                                                                |

**Abbreviations:** RA, real-acupuncture; SA, sham-acupuncture; CV4, Guanyuan; CV7, Yinjiao; EX-CA1, Zigong; EX-HN3, Yintang; GB38, Yangfu; GB39, Xuanzhong; GV20, Baihui; KI3, Taixi; LI12, Zhouliao; LI13, Shouwuli; LR3, Taichong; PC6, Neiguan; SP6, Sanyinjiao; ST38, Tiaokou; TE8, Sanyangluo; TE9, Sidu

**Appendix 4 Sleep hygiene behavior/habit checklist (SHBC)**

| Items                                                                                                                                                                                                   | Yes (1 point) | No (0 point) |
|---------------------------------------------------------------------------------------------------------------------------------------------------------------------------------------------------------|---------------|--------------|
| 1. Stay up late; or Do not have regular sleep routine                                                                                                                                                   |               |              |
| 2. Do not have a good sleep environment (e.g., you will be disturbed by light and/or sound, or cannot avoid extreme temperature and/or humidity while sleeping, etc.)                                   |               |              |
| 3. Do not have a balanced diet; or Eat food that is too spicy, too cold, greasy, salty or too sweet                                                                                                     |               |              |
| 4. Drink strong tea or caffeinated or alcoholic beverages after 12 P.M.                                                                                                                                 |               |              |
| 5. Take naps at daytime except at lunch break; or The nap time at lunch break more than 30 minutes                                                                                                      |               |              |
| 6. Cannot maintain a positive mood                                                                                                                                                                      |               |              |
| 7. Watching exciting movies or TV shows, or chatting excitedly with family or friends half an hour before going to bed; or Eat food or do vigorous physical activity within 2 hours before going to bed |               |              |
| 8. Use your electronic products (e.g., phone, pad, etc.) while lying in bed                                                                                                                             |               |              |
| 9. If you wake up or go to the toilet at midnight, you often check the time before lie down and continue to sleep                                                                                       |               |              |
| 10. Often bring the daily problems to bed; or Often make plans while lying in bed                                                                                                                       |               |              |
| Total scores                                                                                                                                                                                            |               |              |

### Appendix 5 Schedule of enrolment, interventions, and assessments

| Timepoints                                                                | Enrolment<br>-1 week | Baseline<br>assessment | Intervention phase                                             |        | Post-treatment<br>assessment | Follow-up assessment |              |
|---------------------------------------------------------------------------|----------------------|------------------------|----------------------------------------------------------------|--------|------------------------------|----------------------|--------------|
|                                                                           |                      |                        | 0 day                                                          | 8 week |                              | 8th week             | 16th<br>week |
| <i>Enrolment</i>                                                          |                      |                        |                                                                |        |                              |                      |              |
| Eligibility screen                                                        | X                    |                        |                                                                |        |                              |                      |              |
| Informed consent                                                          | X                    |                        |                                                                |        |                              |                      |              |
| Medical history                                                           | X                    |                        |                                                                |        |                              |                      |              |
| Physical examination                                                      | X                    |                        |                                                                |        | X                            |                      | X            |
| Allocation                                                                | X                    |                        |                                                                |        |                              |                      |              |
| <i>Interventions</i>                                                      |                      |                        |                                                                |        |                              |                      |              |
| RA                                                                        |                      |                        | 17 sessions of RA treatment on relevant acupoints to PMD/PMI   |        |                              |                      |              |
| SA                                                                        |                      |                        | 17 sessions of SA treatment on irrelevant acupoints to PMD/PMI |        |                              |                      |              |
| <i>Outcome measures</i>                                                   |                      |                        |                                                                |        |                              |                      |              |
| Primary outcome                                                           |                      |                        |                                                                |        |                              |                      |              |
| HAM-D <sub>17</sub>                                                       |                      | X                      |                                                                |        | X                            | X                    | X            |
| PSQI                                                                      |                      | X                      |                                                                |        | X                            | X                    | X            |
| Secondary outcomes                                                        |                      |                        |                                                                |        |                              |                      |              |
| Meno-D                                                                    |                      | X                      |                                                                |        | X                            | X                    | X            |
| ISI                                                                       |                      | X                      |                                                                |        | X                            | X                    | X            |
| KI                                                                        |                      | X                      |                                                                |        | X                            | X                    | X            |
| MenQoL                                                                    |                      | X                      |                                                                |        | X                            | X                    | X            |
| HAM-A                                                                     |                      | X                      |                                                                |        | X                            | X                    | X            |
| Sex hormone level test (FSH, E <sub>2</sub> , LH)                         |                      | X                      |                                                                |        | X                            |                      |              |
| SHBC                                                                      |                      | X                      |                                                                |        | X                            |                      | X            |
| <i>Impact of and responses to stressful life events</i>                   |                      |                        |                                                                |        |                              |                      |              |
| SRRS                                                                      |                      | X                      |                                                                |        |                              |                      | X            |
| SCSQ                                                                      |                      | X                      |                                                                |        | X                            |                      | X            |
| <i>Expectation, sensation, perception and satisfaction of acupuncture</i> |                      |                        |                                                                |        |                              |                      |              |
| AES                                                                       |                      | X                      | end of ninth treatment session                                 |        |                              |                      |              |
| MASS                                                                      |                      |                        | end of ninth treatment session                                 |        |                              |                      |              |
| APS                                                                       |                      |                        |                                                                |        | X                            |                      |              |
| MS-TSQ                                                                    |                      |                        | end of ninth treatment session                                 |        | X                            |                      |              |
| <i>Adverse events</i>                                                     |                      | X                      | X                                                              | X      | X                            | X                    | X            |
| <i>Success of blinding</i>                                                |                      |                        |                                                                |        |                              |                      | X            |

**Abbreviations** RA, real-acupuncture; SA, sham-acupuncture; HAM-D<sub>17</sub>, 17 items-Hamilton Depression Rating Scale; PSQI, Pittsburgh Sleep Quality Index; ISI, Insomnia Severity Index; KI, Kupperman Index; MenQoL, Menopause-specific Quality of Life; HAM-A, Hamilton Anxiety Scale; SHBC, Sleep Hygiene Behavior Checklist;

SRRS, Social Readjustment Rating Scale; SCSQ, Simplified Coping Style Questionnaire; AES, Acupuncture Expectancy Scale; MASS, Massachusetts General Hospital Acupuncture Sensation Scale; APS, Acupuncture Perception Scale; MS-TSQ, Menopause Symptoms Treatment Satisfaction Questionnaire; FSH, follicle-stimulating hormone; E<sub>2</sub>, estradiol; LH, luteinizing hormone.

**Appendix 6 Main effect, time effect, and interaction effect analysed by linear mixed-effect models for HAM-D<sub>17</sub>, PSQI, Meno-D, ISI, KI, MenQoL, HAM-A, SHBC and SCSQ outcomes with ITT/PP analysis (ITT dataset, participants = 70; PP dataset, participants = 41)**

| Outcome             | Analysis method | N  | Main effect |                | Time effect |                | Interaction (time*group) effect |                |
|---------------------|-----------------|----|-------------|----------------|-------------|----------------|---------------------------------|----------------|
|                     |                 |    | <i>F</i>    | <i>p value</i> | <i>F</i>    | <i>p value</i> | <i>F</i>                        | <i>p value</i> |
| HAM-D <sub>17</sub> | ITT             | 70 | 0.56        | 0.46           | 16.15       | < 0.01         | 0.81                            | 0.37           |
|                     | PP              | 41 | 0.09        | 0.77           | 10.93       | < 0.01         | 0.67                            | 0.57           |
| PSQI                | ITT             | 70 | 2.00        | 0.16           | 12.98       | < 0.01         | 4.56                            | 0.33           |
|                     | PP              | 41 | 5.03        | 0.03           | 11.94       | < 0.01         | 5.91                            | < 0.01         |
| Meno-D              | ITT             | 70 | 0.46        | 0.50           | 23.58       | < 0.01         | 0.37                            | 0.54           |
|                     | PP              | 41 | 0.20        | 0.66           | 14.58       | < 0.01         | 0.12                            | 0.95           |
| ISI                 | ITT             | 70 | 2.72        | 0.10           | 12.03       | < 0.01         | 4.55                            | 0.03           |
|                     | PP              | 41 | 5.22        | 0.03           | 12.16       | < 0.01         | 6.30                            | < 0.01         |
| KI                  | ITT             | 70 | 0.33        | 0.57           | 12.37       | < 0.01         | 0.04                            | 0.84           |
|                     | PP              | 41 | 0.12        | 0.73           | 8.12        | < 0.01         | 0.45                            | 0.72           |
| MenQoL              |                 |    |             |                |             |                |                                 |                |
| Vasomotor           | ITT             | 70 | 0.01        | 0.94           | 0.26        | 0.85           | 0.26                            | 0.61           |
|                     | PP              | 41 | 0.78        | 0.38           | 0.27        | 0.85           | 0.93                            | 0.43           |
| Psychosocial        | ITT             | 70 | 0.10        | 0.76           | 18.51       | < 0.01         | 0.80                            | 0.37           |
|                     | PP              | 41 | 0.07        | 0.80           | 17.49       | < 0.01         | 0.85                            | 0.47           |
| Physical            | ITT             | 70 | 0.50        | 0.48           | 4.66        | < 0.01         | 0.33                            | 0.57           |
|                     | PP              | 41 | 0.05        | 0.83           | 4.73        | < 0.01         | 0.31                            | 0.82           |
| Sexual              | ITT             | 70 | 0.05        | 0.82           | 0.04        | 0.96           | 0.31                            | 0.58           |
|                     | PP              | 41 | 0.49        | 0.49           | 1.30        | 0.28           | 5.05                            | < 0.01         |
| HAM-A               | ITT             | 70 | 1.68        | 0.20           | 5.47        | < 0.01         | 2.64                            | 0.10           |
|                     | PP              | 41 | 3.73        | 0.06           | 4.44        | < 0.01         | 2.96                            | 0.04           |
| SHBC                | ITT             | 70 | 0.02        | 0.90           | 38.73       | < 0.01         | 0.08                            | 0.78           |
|                     | PP              | 41 | 0.47        | 0.50           | 28.85       | < 0.01         | 0.88                            | 0.42           |
| SCSQ                |                 |    |             |                |             |                |                                 |                |
| positive coping     | ITT             | 70 | 0.52        | 0.47           | 0.38        | 0.69           | 0.37                            | 0.55           |
|                     | PP              | 41 | 0.01        | 0.92           | 1.61        | 0.21           | 0.16                            | 0.85           |
| negative coping     | ITT             | 70 | 3.39        | 0.07           | 1.10        | 0.36           | 0.28                            | 0.59           |
|                     | PP              | 41 | 1.91        | 0.18           | 2.30        | 0.11           | 0.31                            | 0.74           |

**Abbreviations** ITT, Intention-To-Treat analysis; PP, Per-Protocol analysis; HAM-D<sub>17</sub>, 17 items-Hamilton Depression Rating Scale; PSQI, Pittsburgh Sleep Quality Index; ISI, Insomnia Severity Index; KI, Kupperman Index; MenQoL, Menopause-specific Quality of Life; HAM-A, Hamilton Anxiety Scale; SHBC, Sleep Hygiene Behavior Checklist; SCSQ, Simplified Coping Style Questionnaire.
